# Supplementary material for: Ex vivo rectal explant model reveals potential opposing roles of Natural Killer cells and Marginal Zone-like B cells in HIV-1 infection
Source: PubMed Central journal article supplement (PMC7677325; doi:10.1038/s41598-020-76976-5), 2020-11-19

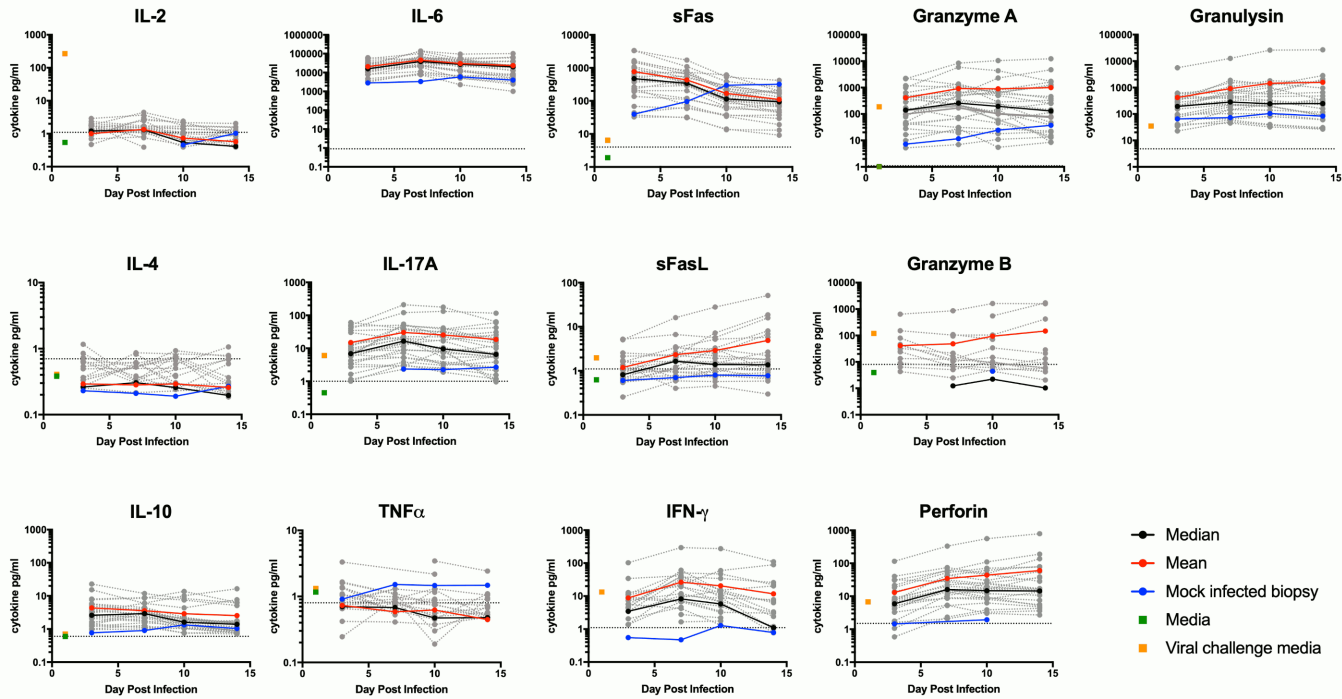

Supplement: 41598_2020_76976_MOESM2_ESM.pdf [file 41598_2020_76976_MOESM2_ESM.pdf]
